# Supplementary material
Source: publisher figshare collection journal article supplement (https://sage.figshare.com/ndownloader/files/21146025)

| Study                 | Selection of the reported result | Measurement of outcomes | Missing Data | Deviation from intended intervention | Classification of interventions | Selection of participants | Confounding |
|-----------------------|----------------------------------|-------------------------|--------------|--------------------------------------|---------------------------------|---------------------------|-------------|
| Baruteau et al., 2018 | Yellow                           | Orange                  | Green        | Green                                | Green                           | Green                     | Green       |
| Eastaugh et al, 2014  | Yellow                           | Orange                  | Green        | Green                                | Yellow                          | Green                     | Green       |
| Moazzami et al., 2016 | Yellow                           | Orange                  | Green        | Green                                | Green                           | Green                     | Green       |
| O'Byrne et al., 2015  | Yellow                           | Orange                  | Green        | Green                                | Green                           | Green                     | Green       |
| Petroni et al., 2014  | Yellow                           | Orange                  | Green        | Green                                | Green                           | Green                     | Green       |
| Seib et al., 1999     | Yellow                           | Orange                  | Green        | Green                                | Green                           | Green                     | Green       |
| Tepper et al., 2017   | Yellow                           | Orange                  | Yellow       | Green                                | Green                           | Green                     | Green       |

#### Legend

Low Risk of Bias

Moderate Risk of Bias

Serious Risk of Bias

Critical Risk of Bias

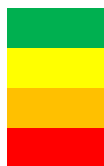

Supplement: Supplementary file 1 [file 21146025]
